# Supplementary material
Source: PubMed Central journal article supplement (PMC7907416)
Supplement: NIHMS1669084-supplement-Supplementary_Material.pdf [file NIHMS1669084-supplement-Supplementary_Material.pdf]

## Supporting Information

### Pharmacokinetics and Safety of Mitragynine in Beagle Dogs

Elizabeth A. Maxwell<sup>1</sup>, Tamara I. King<sup>2</sup>, Shyam H. Kamble<sup>2, 3</sup>, Kanumuri Siva Rama Raju<sup>2, 3</sup>, Erin C. Berthold<sup>2</sup>, Francisco León<sup>4</sup>, Bonnie A. Avery<sup>2, 3</sup>, Lance R. McMahon<sup>5</sup>, Christopher R. McCurdy<sup>3, 4</sup>, Abhisheak Sharma<sup>2, 3</sup>

#### Affiliations

<sup>1</sup>Department of Small Animal Clinical Sciences, College of Veterinary Medicine, University of Florida, Gainesville, FL, USA

<sup>2</sup>Department of Pharmaceutics, College of Pharmacy, University of Florida, Gainesville, FL, USA

<sup>3</sup>Translational Drug Development Core, Clinical and Translational Science Institute, University of Florida, Gainesville, FL, USA

<sup>4</sup>Department of Medicinal Chemistry, College of Pharmacy, University of Florida, Gainesville, FL, USA

<sup>5</sup>Department of Pharmacodynamics, College of Pharmacy, University of Florida, Gainesville, FL, USA

## Correspondence

### ***Dr. Abhisheak Sharma***

Research Assistant Professor of Pharmaceutics and Assistant Director of UF Translational Drug

Development Core

Department of Pharmaceutics

University of Florida

1345 Center Drive

Gainesville, FL, 32610

USA

Phone: +1 352 294 8690

Fax: +1 352 273 7854

[asharma1@cop.ufl.edu](mailto:asharma1@cop.ufl.edu)

### ***Dr. Christopher R. McCurdy***

Professor of Medicinal Chemistry and Director of UF Translational Drug Development Core

Department of Medicinal Chemistry

University of Florida

1345 Center Drive

Gainesville, FL 32610

USA

Phone: +1 352 294 8691

Fax: +1 352 392 9455

[cmccurdy@cop.ufl.edu](mailto:cmccurdy@cop.ufl.edu)

## Table of Contents

|                                                                                                                                                                                                                                                                                                                                                                                                                                                               | Page |
|---------------------------------------------------------------------------------------------------------------------------------------------------------------------------------------------------------------------------------------------------------------------------------------------------------------------------------------------------------------------------------------------------------------------------------------------------------------|------|
| <b>Isolation of mitragynine</b>                                                                                                                                                                                                                                                                                                                                                                                                                               | 4    |
| <b>Synthesis of 7-hydroxymitragynine</b>                                                                                                                                                                                                                                                                                                                                                                                                                      | 4    |
| <b>Fig. 1S.</b> <sup>1</sup> H NMR spectrum mitragynine in CD <sub>3</sub> OD                                                                                                                                                                                                                                                                                                                                                                                 | 5    |
| <b>Fig. 2S.</b> <sup>13</sup> C NMR APT experiment of mitragynine in CD <sub>3</sub> OD                                                                                                                                                                                                                                                                                                                                                                       | 6    |
| <b>Fig. 3S.</b> 2D HSQC experiment of mitragynine in CD <sub>3</sub> OD                                                                                                                                                                                                                                                                                                                                                                                       | 7    |
| <b>Fig. 4S.</b> <sup>1</sup> H NMR spectrum of mitragynine sulfate in CD <sub>3</sub> OD                                                                                                                                                                                                                                                                                                                                                                      | 8    |
| <b>Fig. 5S.</b> <sup>13</sup> C NMR APT experiment of mitragynine sulfate in CD <sub>3</sub> OD                                                                                                                                                                                                                                                                                                                                                               | 9    |
| <b>Fig. 6S.</b> 2D HSQC experiment of mitragynine sulfate in CD <sub>3</sub> OD                                                                                                                                                                                                                                                                                                                                                                               | 10   |
| <b>Fig. 7S.</b> UHPLC-PDA chromatogram of mitragynine sulfate at 254 nm                                                                                                                                                                                                                                                                                                                                                                                       | 11   |
| <b>Table 1S.</b> Peak purity of mitragynine sulfate                                                                                                                                                                                                                                                                                                                                                                                                           | 11   |
| <b>Fig. 8S.</b> UPLC-Q-TOF chromatogram and corresponding MS spectrum of mitragynine sulfate                                                                                                                                                                                                                                                                                                                                                                  | 12   |
| <b>Fig. 9S.</b> <sup>1</sup> H NMR spectrum 7-hydroxymitragynine in CDCl <sub>3</sub>                                                                                                                                                                                                                                                                                                                                                                         | 13   |
| <b>Fig. 10S.</b> <sup>13</sup> C NMR spectrum of 7-hydroxymitragynine in CDCl <sub>3</sub>                                                                                                                                                                                                                                                                                                                                                                    | 14   |
| <b>Fig. 11S.</b> 2D HSQC experiment of 7-hydroxymitragynine CDCl <sub>3</sub>                                                                                                                                                                                                                                                                                                                                                                                 | 15   |
| <b>Fig. 12S.</b> UHPLC-PDA chromatogram and peak purity of 7-hydroxymitragynine at 254 nm                                                                                                                                                                                                                                                                                                                                                                     | 16   |
| <b>Table 2S.</b> Peak purity of 7-hydroxymitragynine                                                                                                                                                                                                                                                                                                                                                                                                          | 17   |
| <b>Fig. 13S.</b> UPLC-Q-TOF chromatogram and corresponding MS spectrum of 7-hydroxymitragynine and its water adduct                                                                                                                                                                                                                                                                                                                                           | 17   |
| <b>Fig. 14S.</b> Mean concentration-time profile of mitragynine after single oral dose (5 mg/kg) of mitragynine in female beagle dogs                                                                                                                                                                                                                                                                                                                         | 18   |
| <b>Fig. 15S.</b> Representative MRM chromatogram of pre-dose test sample before intravenous study for (A) mitragynine, and (B) 7-hydroxymitragynine; stock spiked dog plasma (C) mitragynine (1 ng/mL; LLOQ), and (D) 7-hydroxymitragynine (1 ng/mL; LLOQ); pooled plasma from oral study test samples for (E) mitragynine and (F) 7-hydroxymitragynine; test sample collected at 4 h from intravenous study for (G) mitragynine and (H) 7-hydroxymitragynine | 19   |

### **Isolation of mitragynine**

Mitragynine was obtained from the commercial product Optimized Plant Mediated Solutions (OPMS) Gold capsules (Choice Organics). Ethanol (300 mL, 190 proof) was added to the brown powder of 100 capsules (~70 gr) and then stirred for approx. 1 h. Further, the mixture was filtered using a Buchner funnel (600 mL) with fritted disc C, obtaining a brown solution. Additional ethanol (200 mL) was passed through the funnel until a clear white solid remained as a residue. The combined filtrates were subjected to vacuum evaporation through rotovapor to produce a brown solid (22 gr). The solid (18 gr) was fractionated using vacuum silica gel (5" x 4.2") column chromatography (CC) with gradients increasing the polarity from hexanes to ethyl acetate (EtOAc) and methanol. The fraction eluted with hexanes/EtOAc (7:3) was subjected to successive medium pressure chromatography columns using a combiflash (Teledyne) instrument in an isocratic mobile phase hexanes-EtOAc (8:2) to yield pure mitragynine as a slight yellow solid (6 gr).

### **Synthesis of 7-hydroxymitragynine**

Mitragynine (500 mg, 1.25 mmol) was dissolved in acetonitrile (50 mL), then Pd/C 10% (1.5 g) was added. The resulting suspension was stirred at room temperature, and hydrogen peroxide (30%, 5 mL) was added slowly dropwise. The reaction mixture was stirred for an additional 10 min and passed over a pad of celite to obtain a pinkish solution. An additional 50 mL of acetonitrile were passed through the celite pad, the filtrates were combined and subjected to a vacuum evaporation through rotovapor to produce a yellow gummy solid. The residue was redissolved in chloroform and by CC using a combiflash (Teledyne) instrument in an isocratic mobile phase hexanes-EtOAc (6:4) to yield pure 7-hydroxy mitragynine as a slight yellow solid (300 mg, 0.72 mmol, 58%).

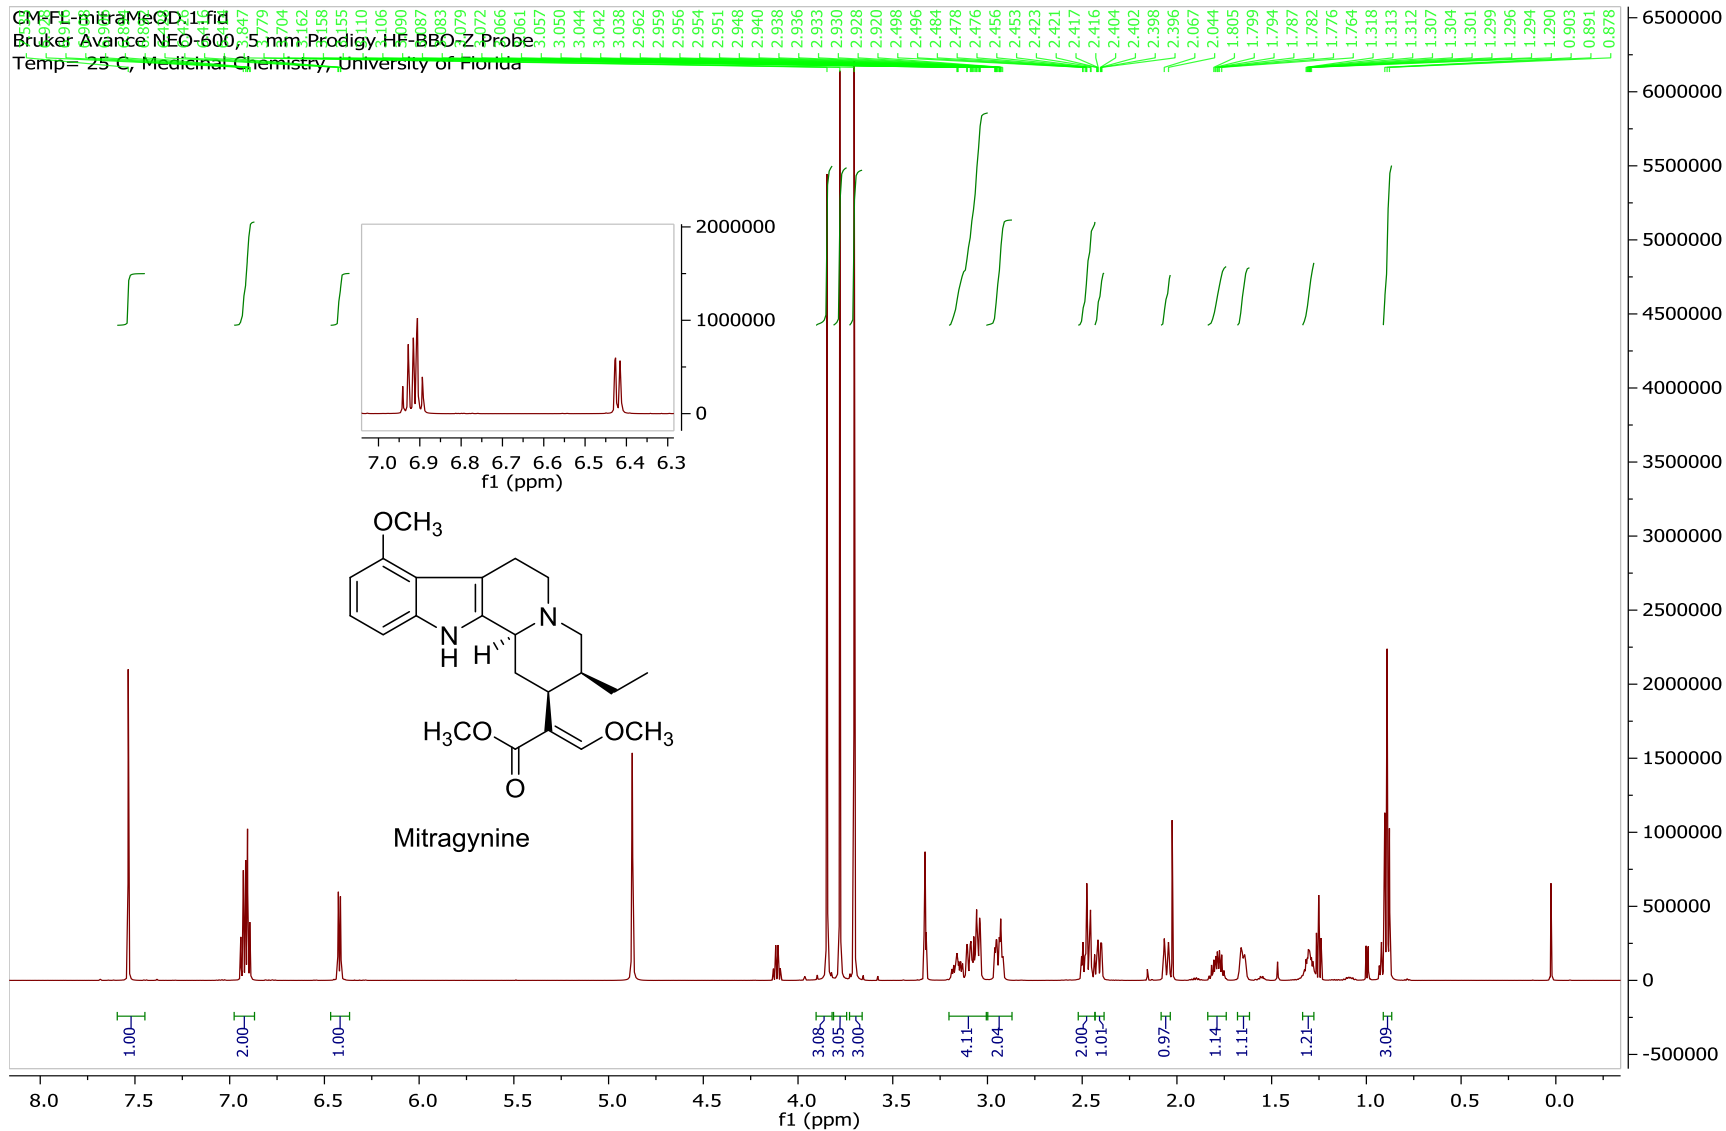

Fig. 1S <sup>1</sup>H NMR spectrum mitragynine in CD<sub>3</sub>OD, 600 MHz

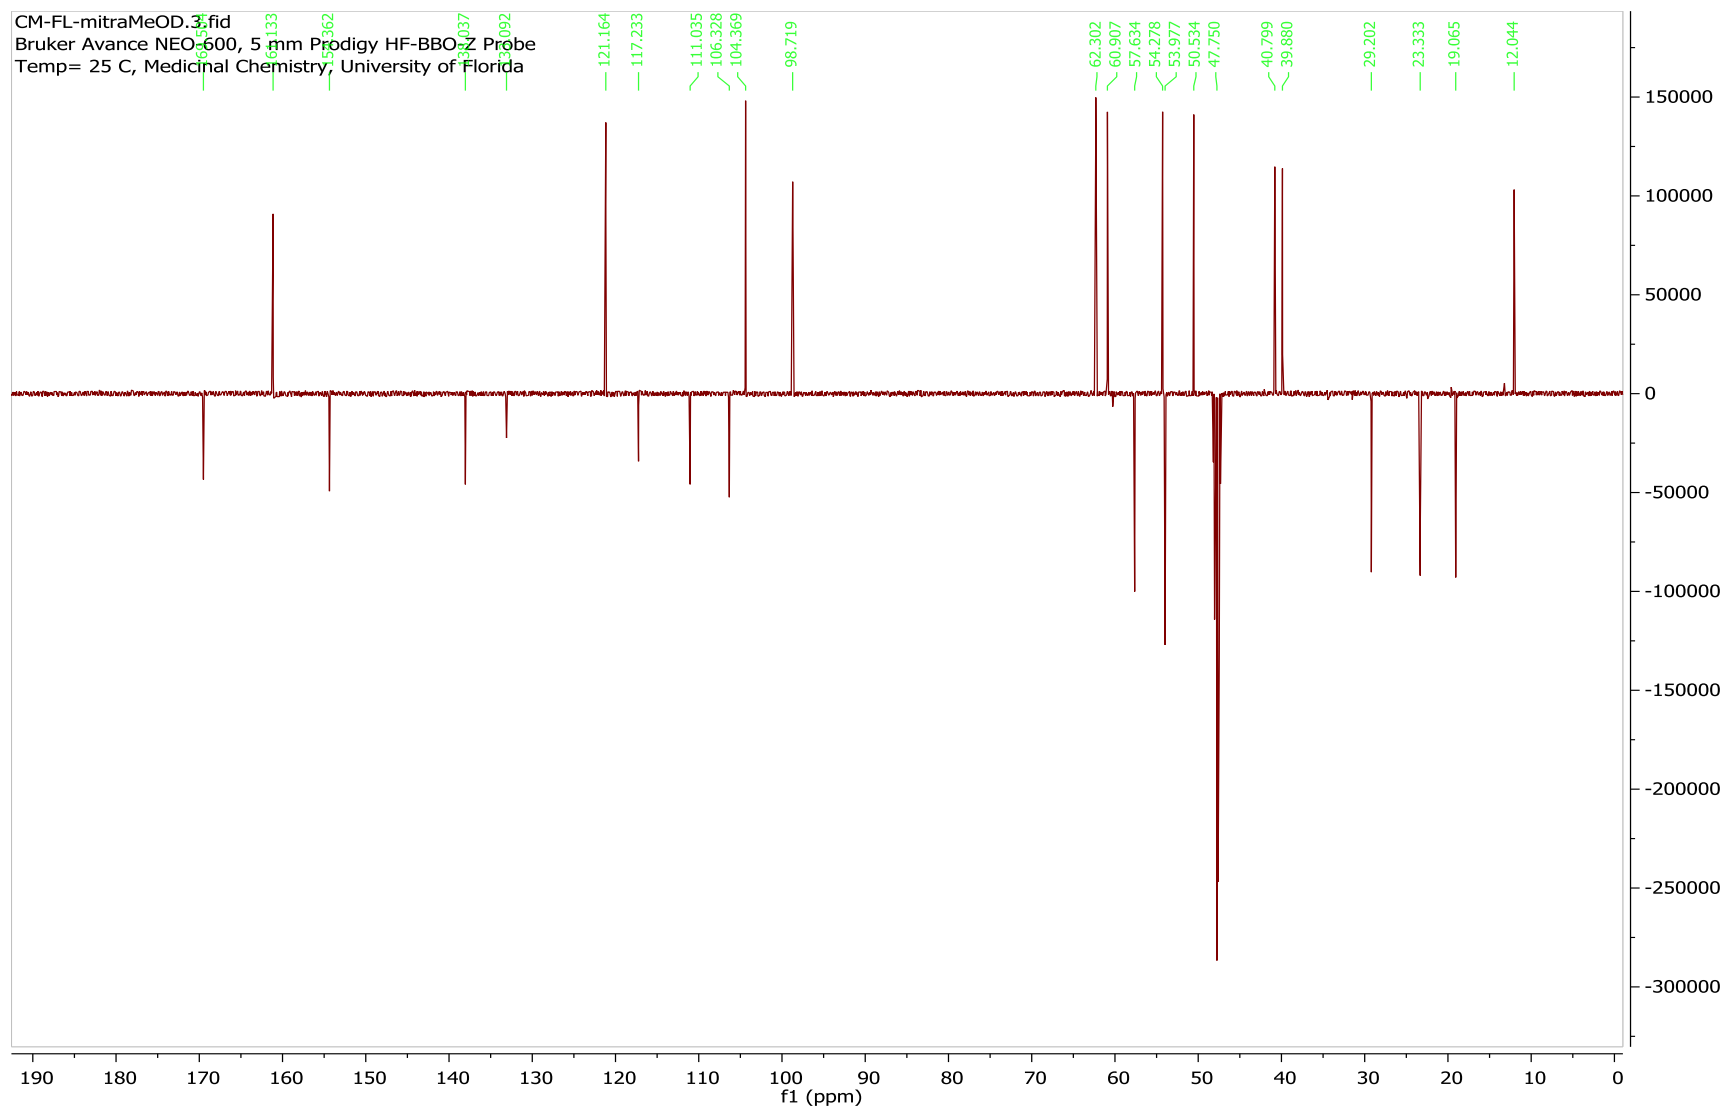

**Fig. 2S.**  $^{13}\text{C}$  NMR APT experiment of mitragynine in  $\text{CD}_3\text{OD}$ , 150 MHz

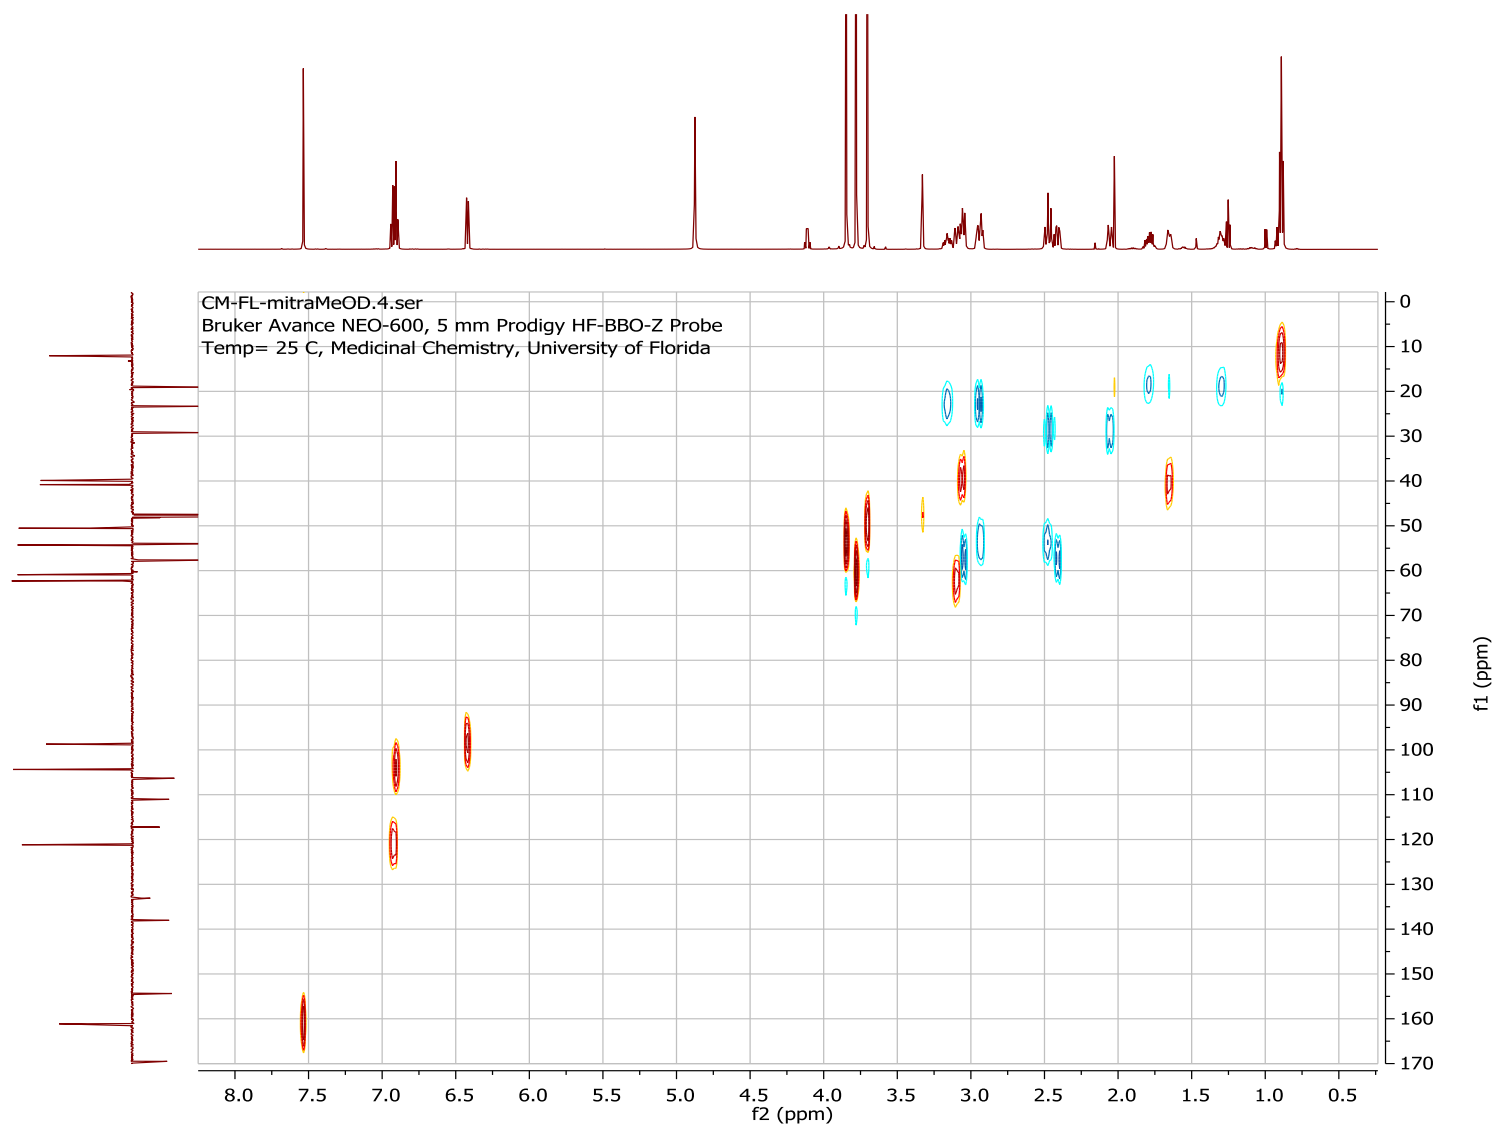

**Fig. 3S** 2D HSQC experiment of mitragynine in CD<sub>3</sub>OD

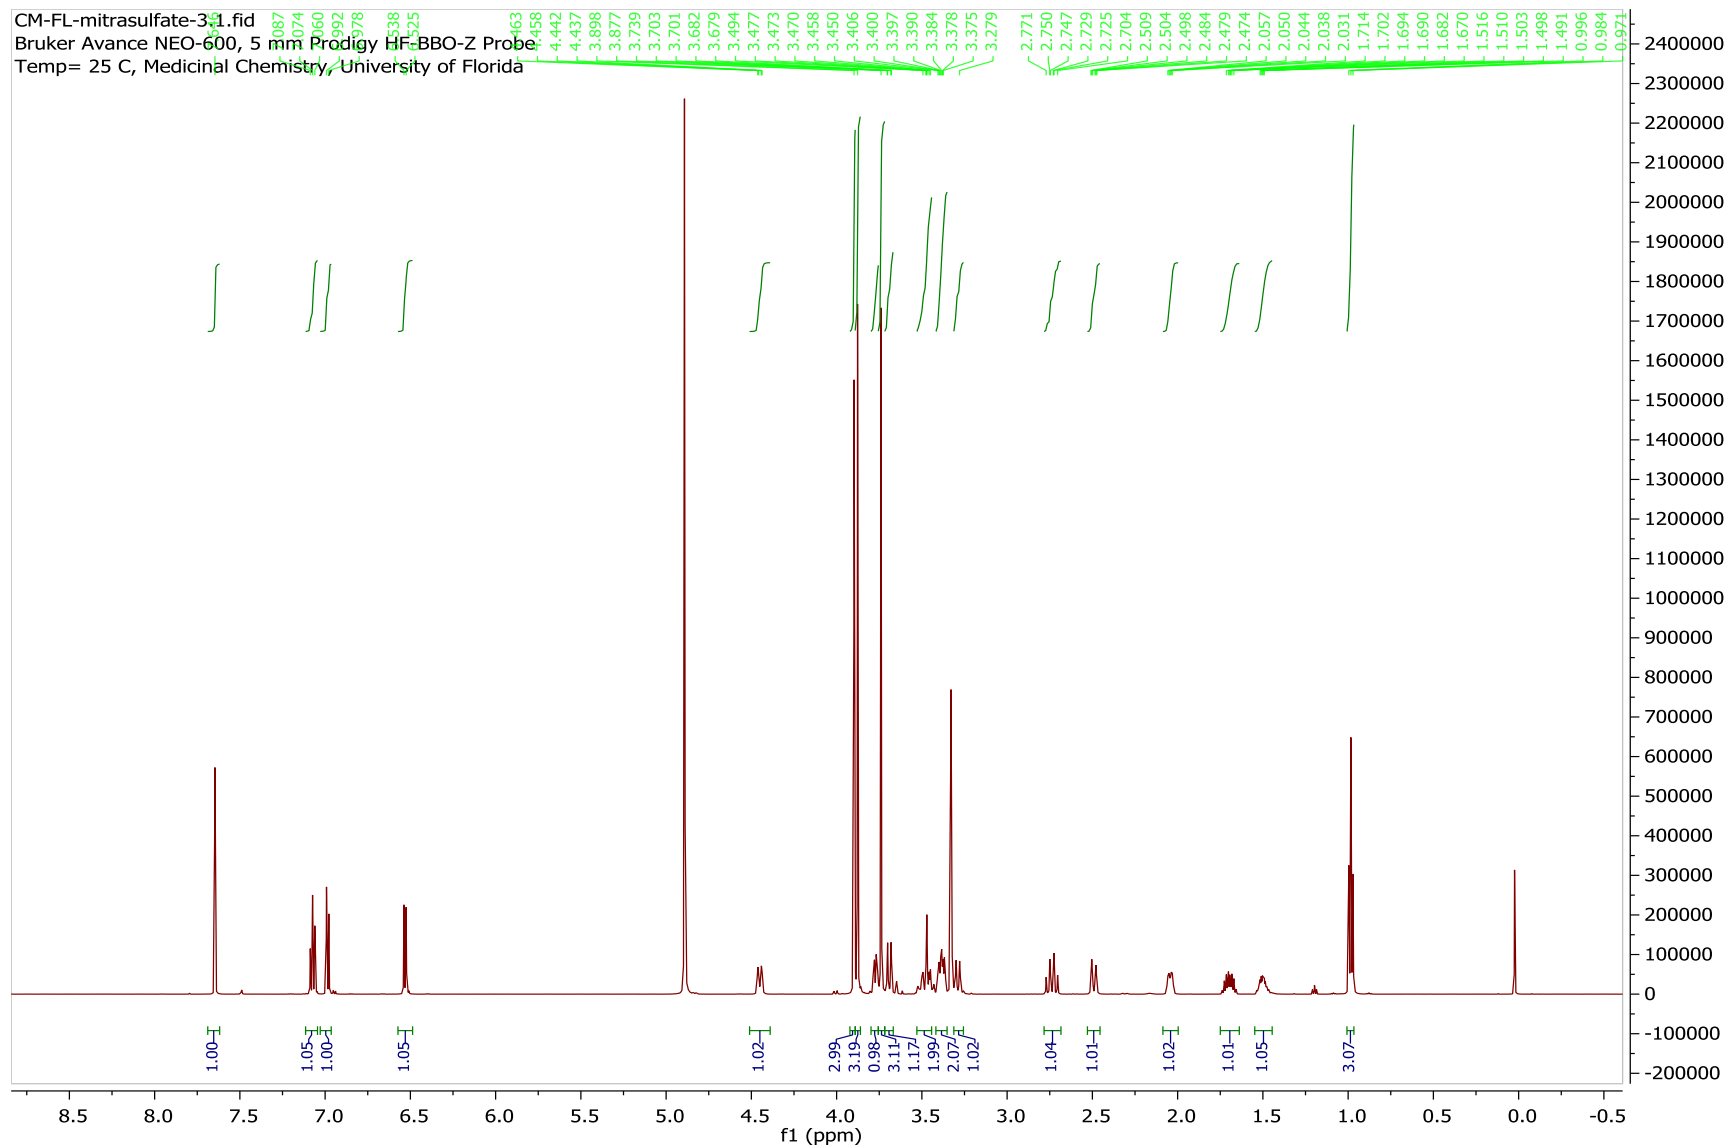

**Fig. 4S**  $^1\text{H}$  NMR spectrum mitragynine sulfate in  $\text{CD}_3\text{OD}$ , 600 MHz



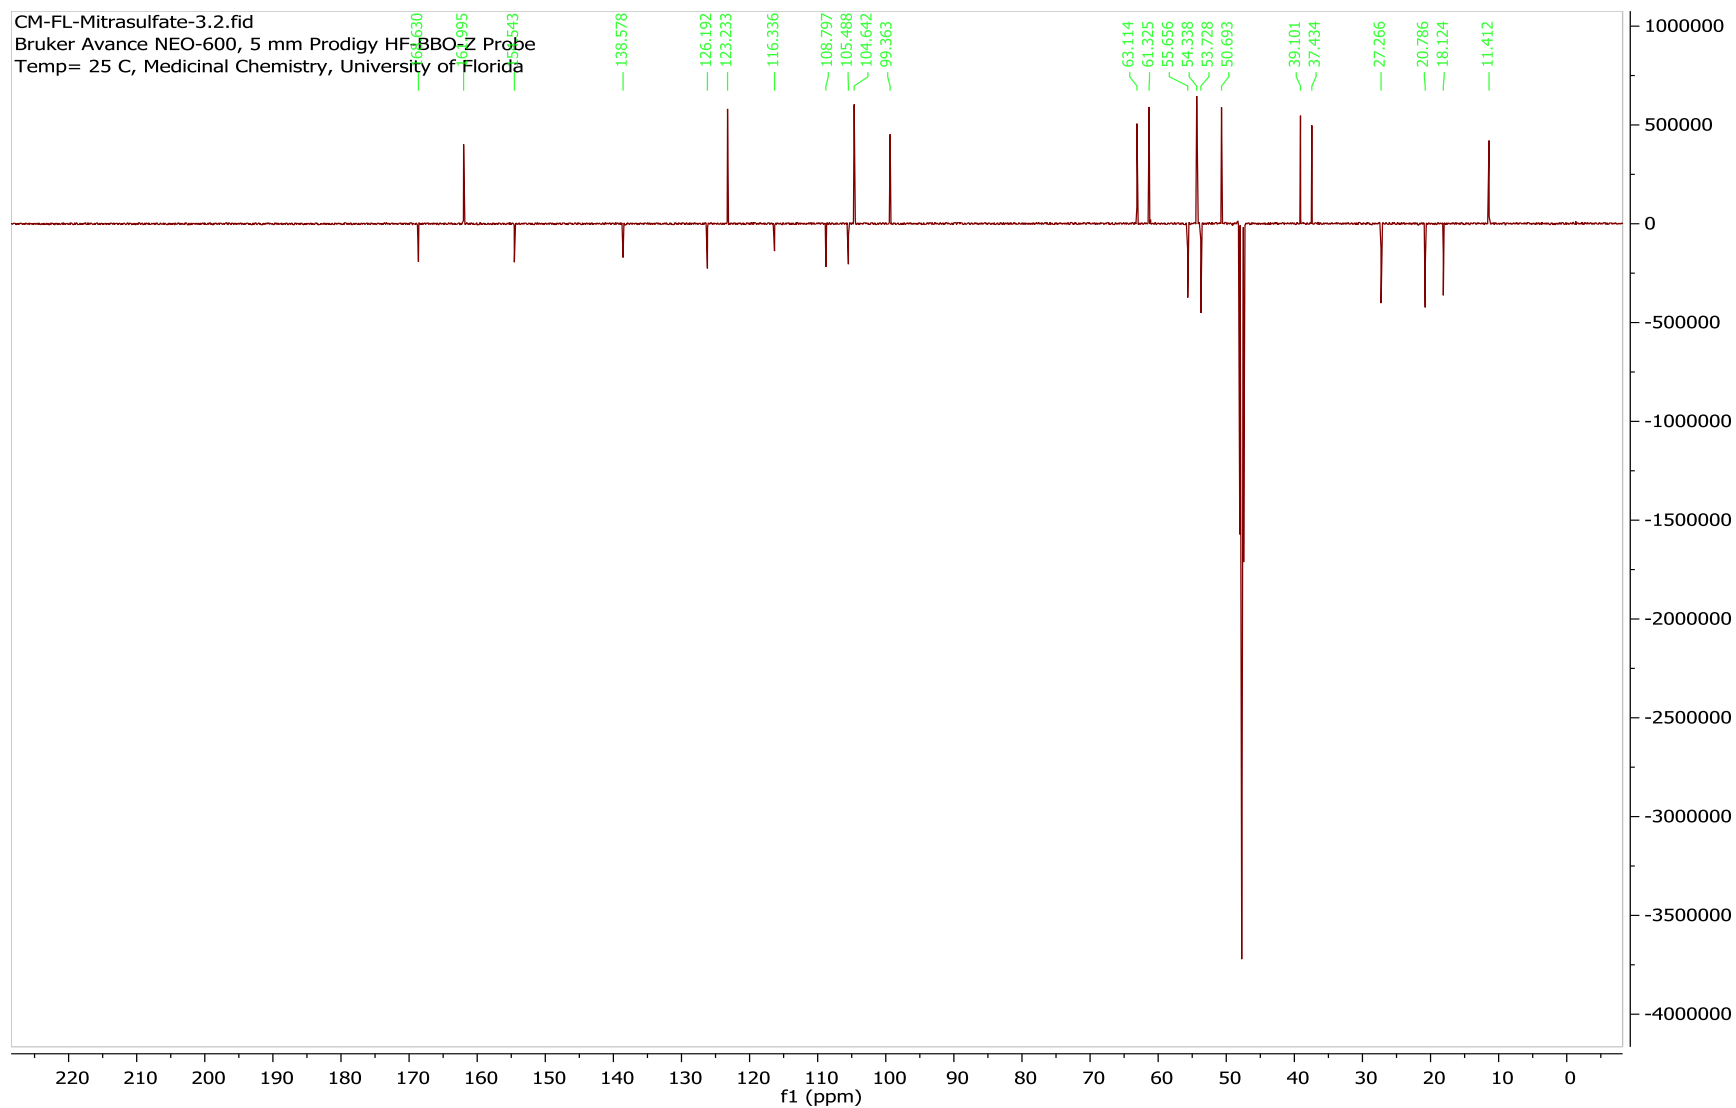

**Fig. 5S**  $^{13}\text{C}$  NMR APT experiment of mitragynine sulfate in  $\text{CD}_3\text{OD}$ , 150 MHz

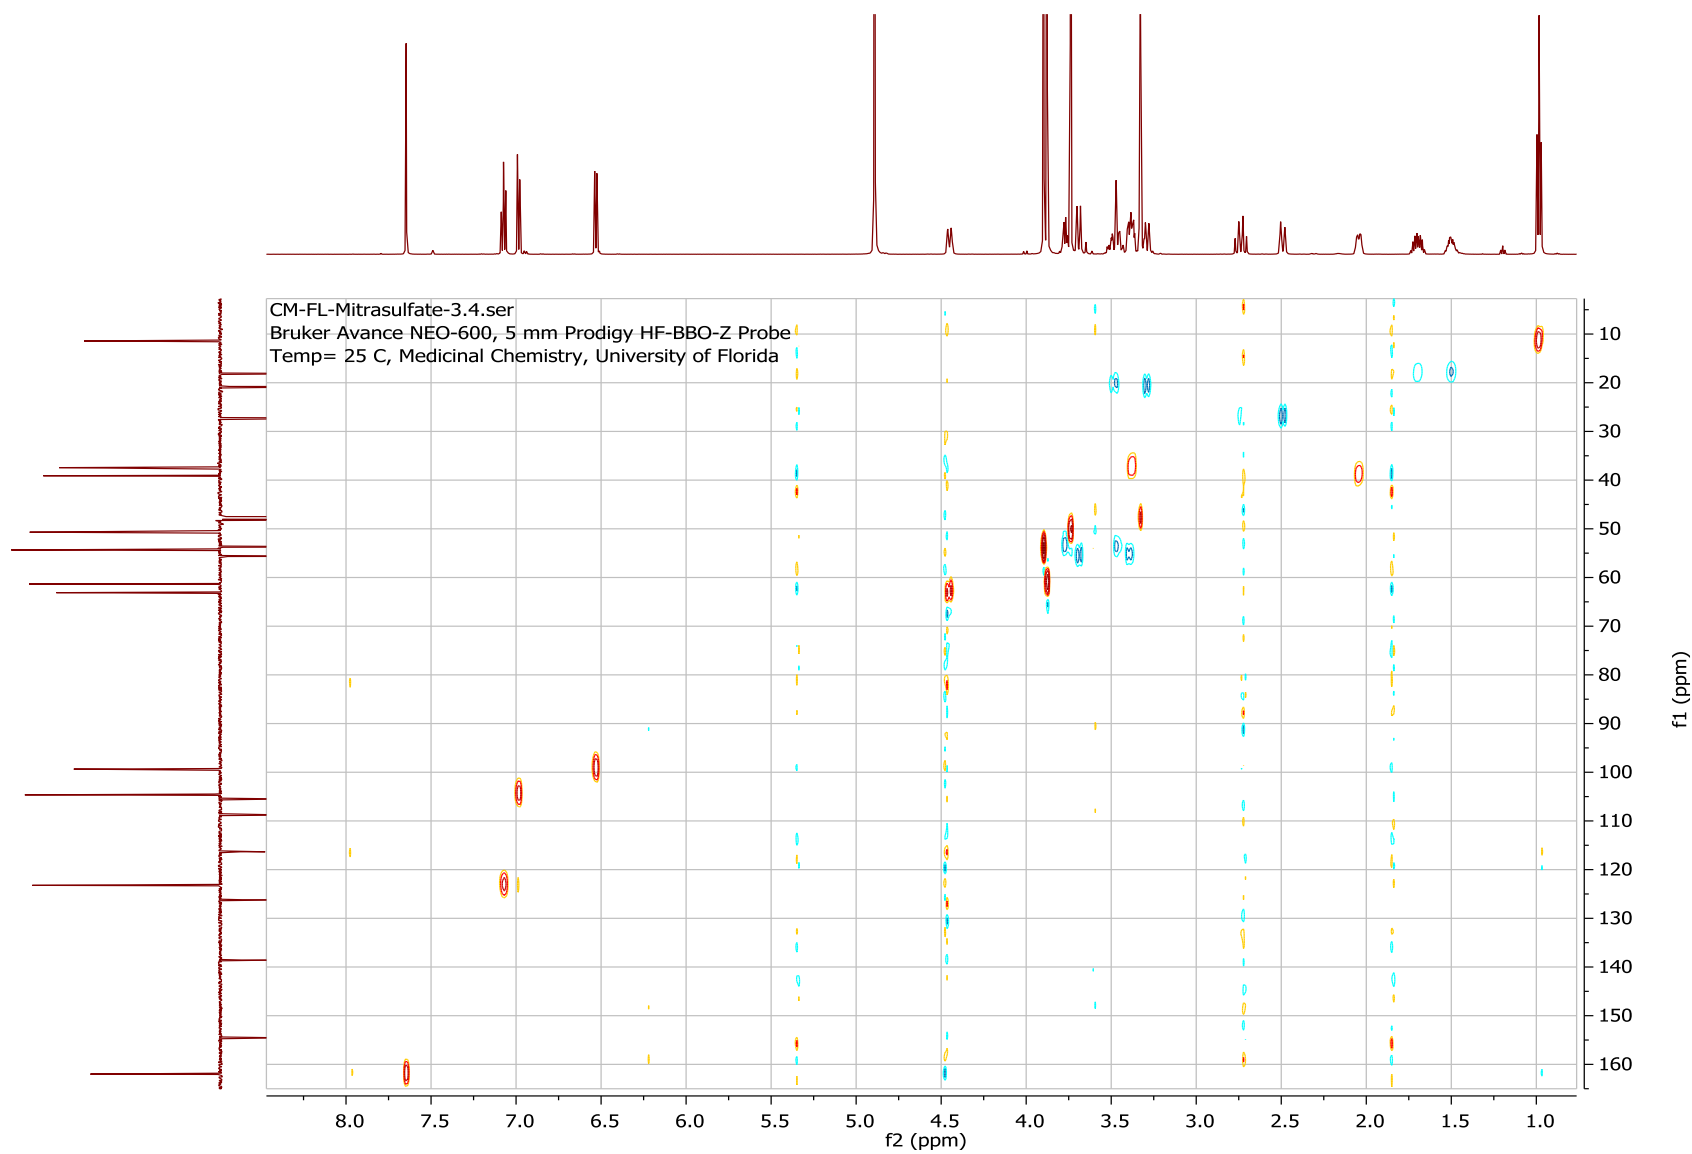

**Fig. 6S** 2D HSQC experiment of mitragynine sulfate in CD<sub>3</sub>OD

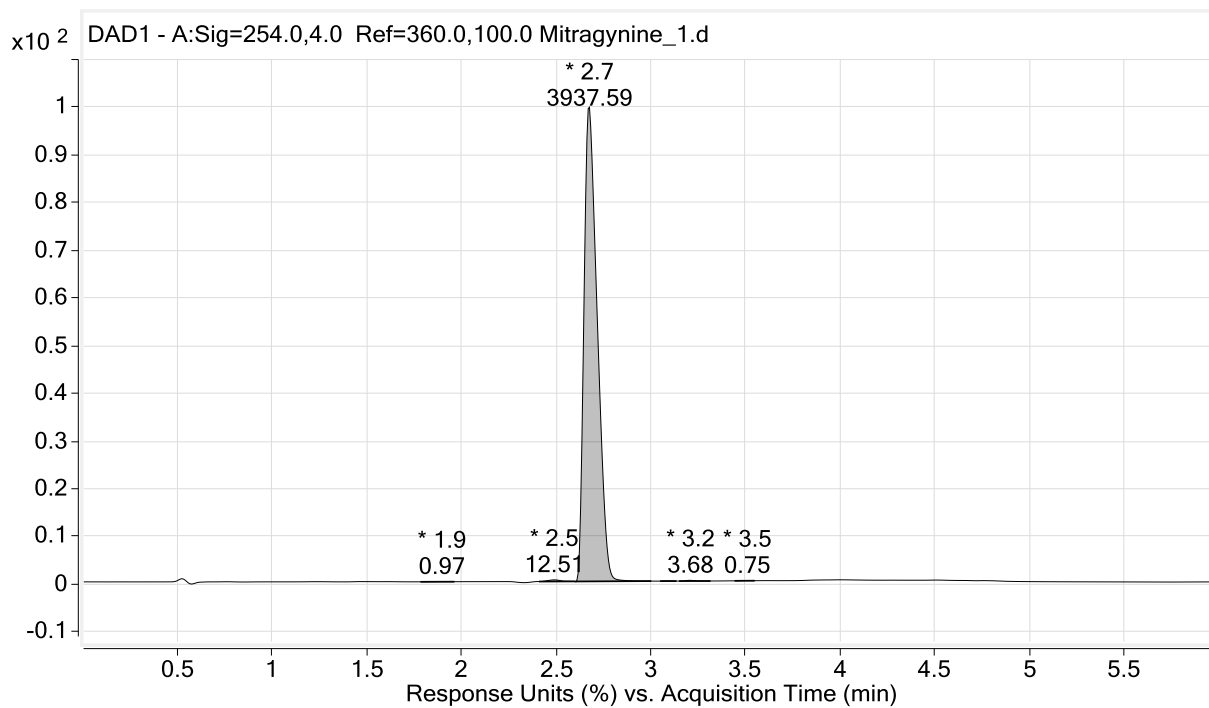

**Fig. 7S** UHPLC-PDA chromatogram and peak purity of mitragynine sulfate at 254 nm.

**Table 1S** Peak purity of mitragynine sulfate

| Peak | RT  | Area    | Area Sum % | Height | Width | Compound    |
|------|-----|---------|------------|--------|-------|-------------|
| 1    | 1.9 | 0.97    | 0.02       | 0.15   | 0.2   |             |
| 2    | 2.5 | 12.51   | 0.32       | 2.71   | 0.2   |             |
| 3    | 2.7 | 3937.59 | 99.53      | 806.42 | 0.4   | Mitragynine |
| 4    | 3.1 | 0.69    | 0.02       | 0.24   | 0.1   |             |
| 5    | 3.2 | 3.68    | 0.09       | 1.23   | 0.2   |             |
| 6    | 3.5 | 0.75    | 0.02       | 0.24   | 0.1   |             |

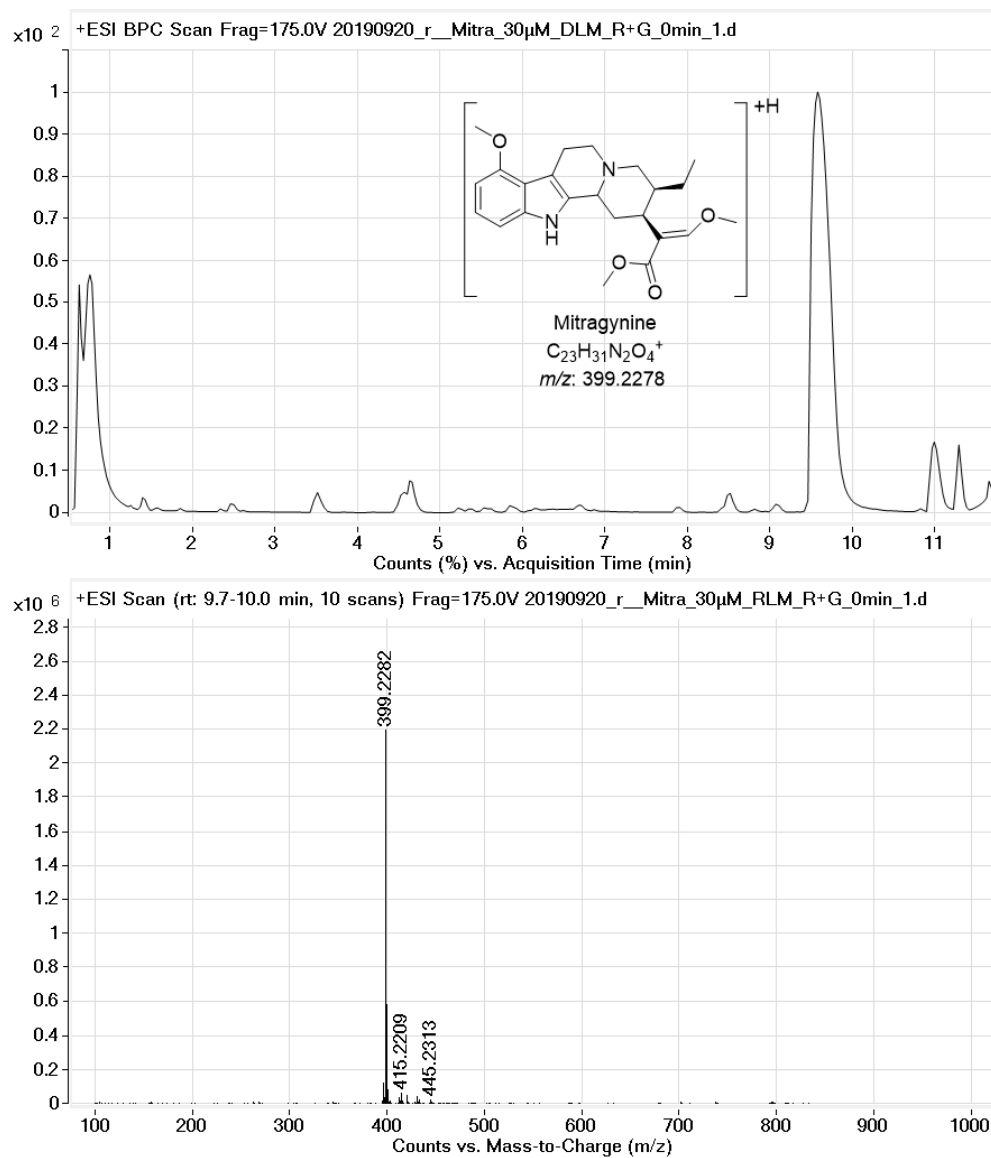

**Fig. 8S** UPLC-Q-TOF chromatogram and corresponding MS spectrum of mitragynine

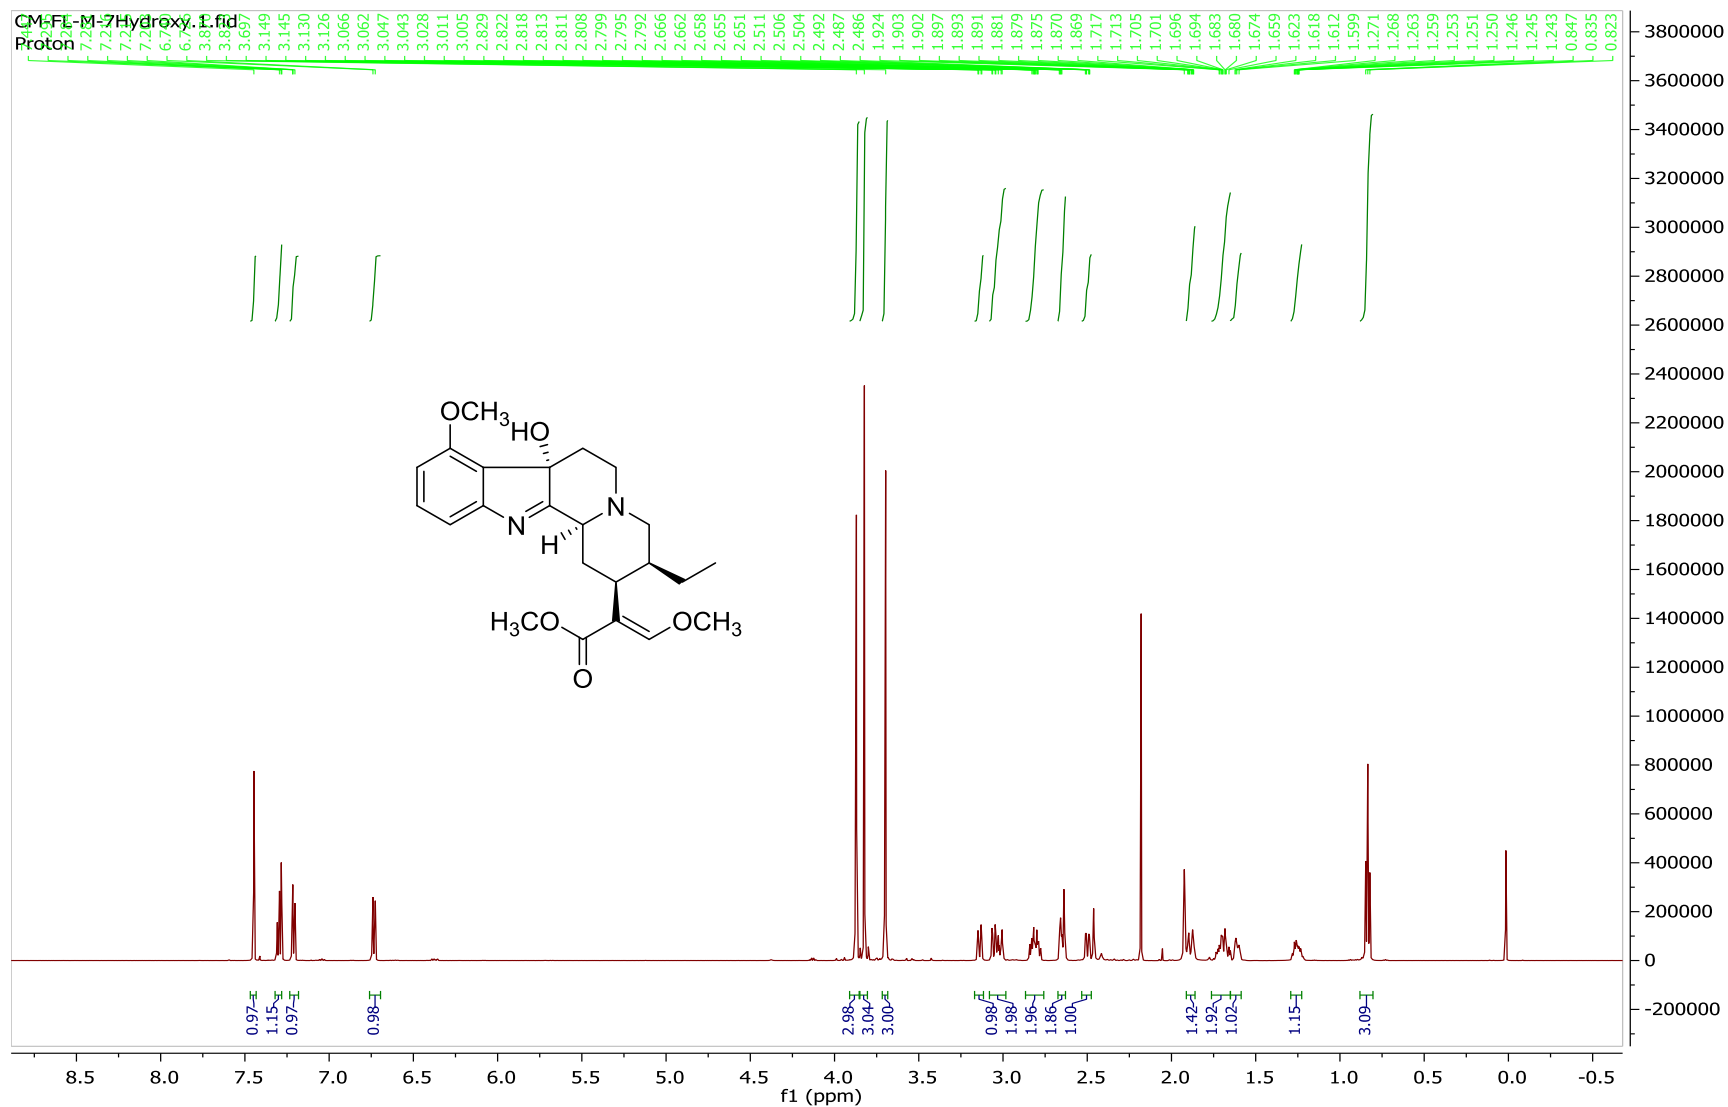

Fig. 9S <sup>1</sup>H NMR spectrum 7-hydroxymitragynine in CDCl<sub>3</sub>, 600 MHz

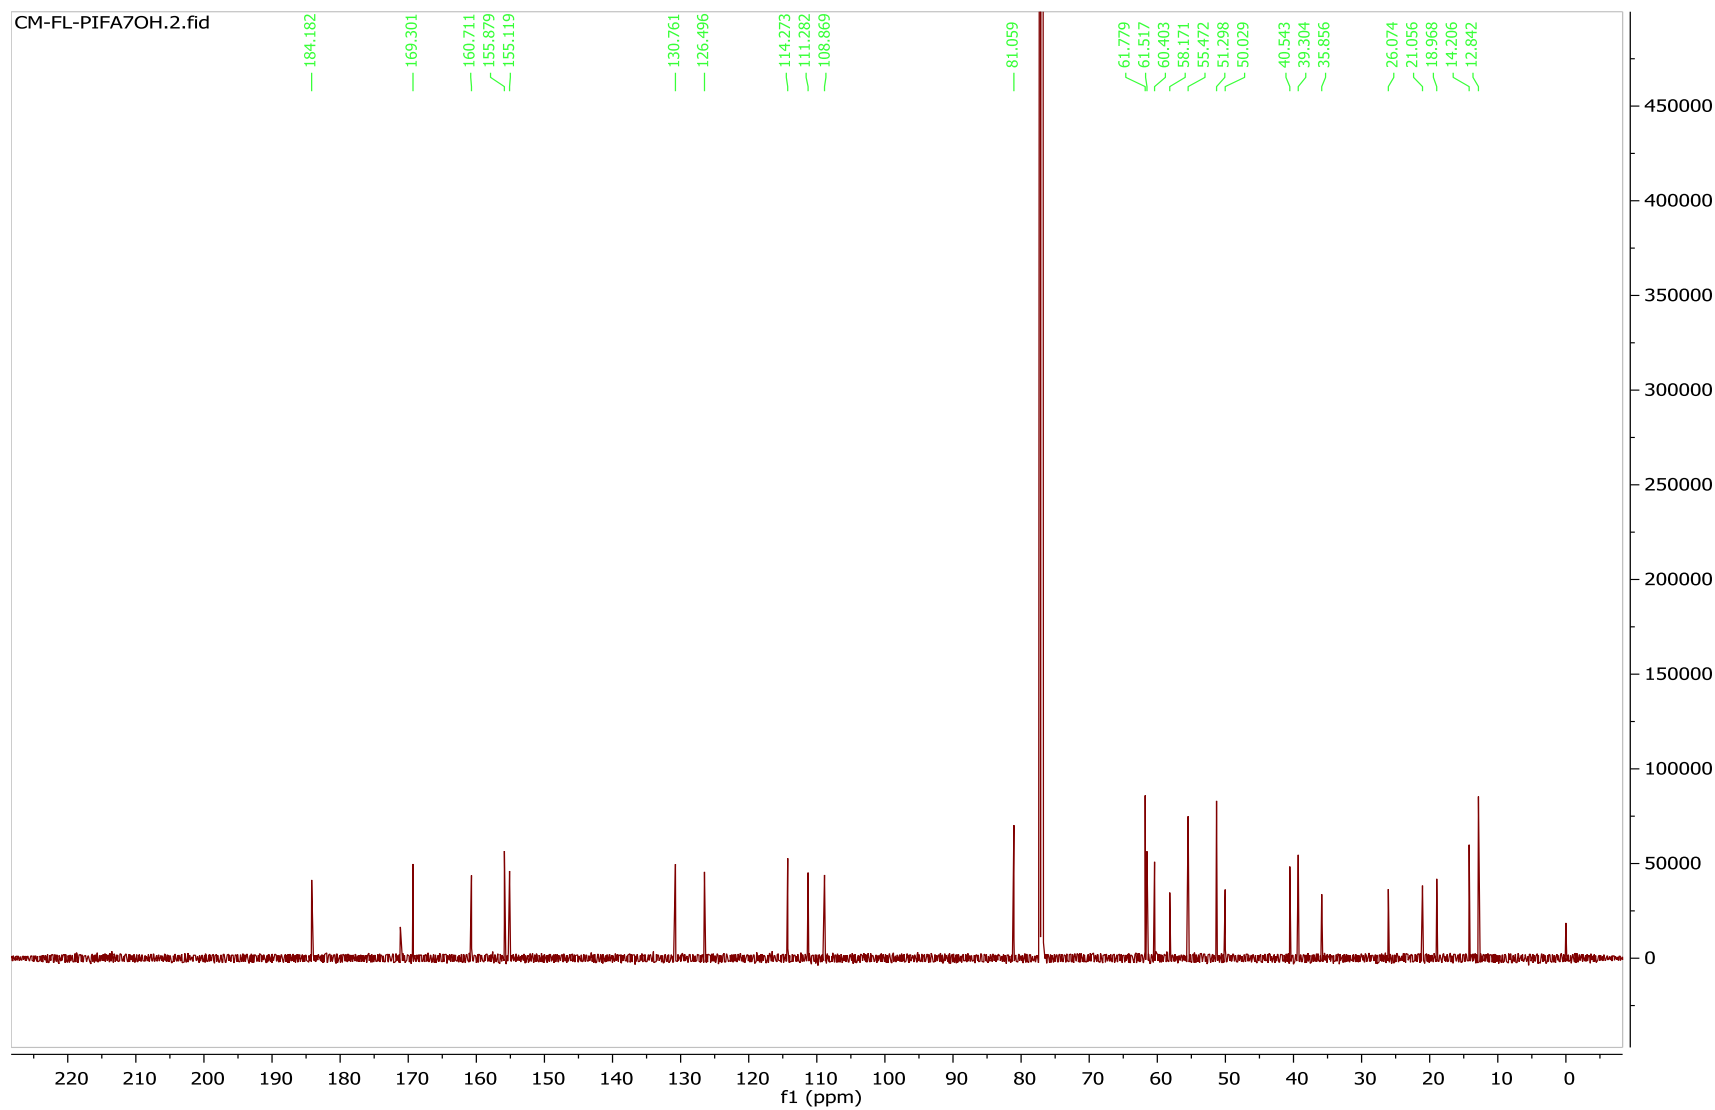

**Fig. 10S**  $^{13}\text{C}$  NMR spectrum of 7-hydroxy mitragynine in  $\text{CDCl}_3$ , 150 MHz

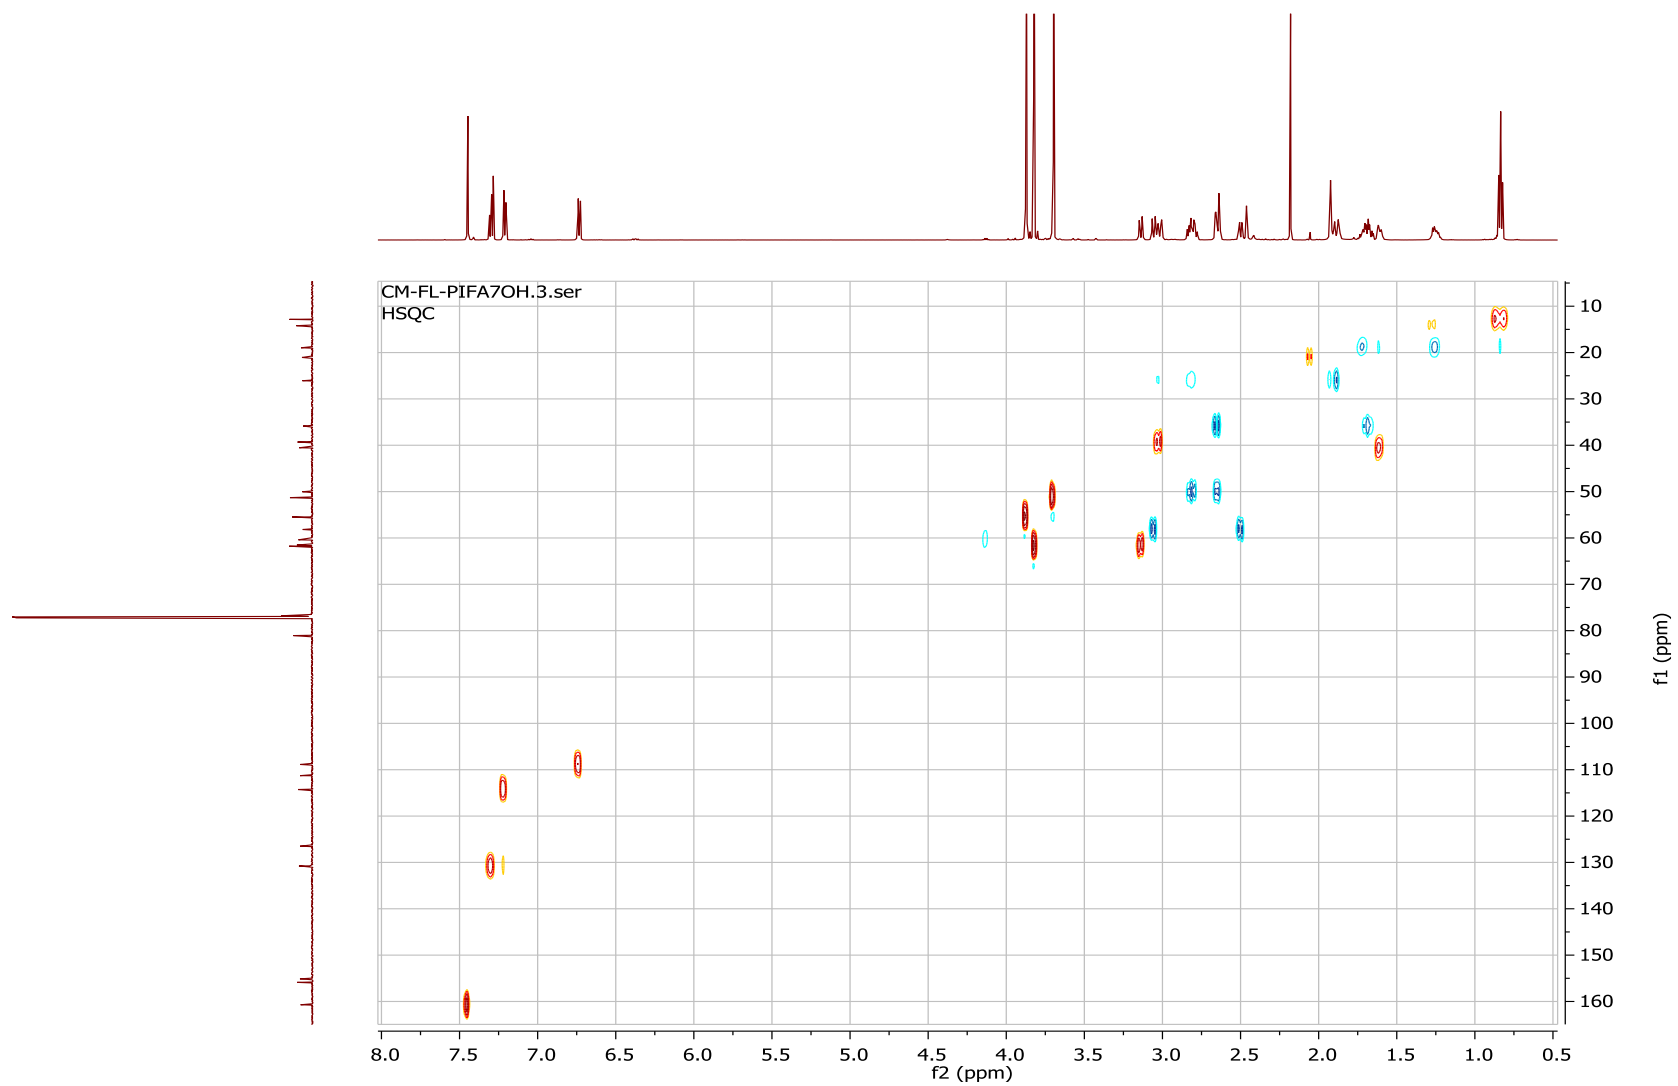

**Fig. 11S** 2D HSQC experiment of 7-hydroxymitragynine  $\text{CDCl}_3$

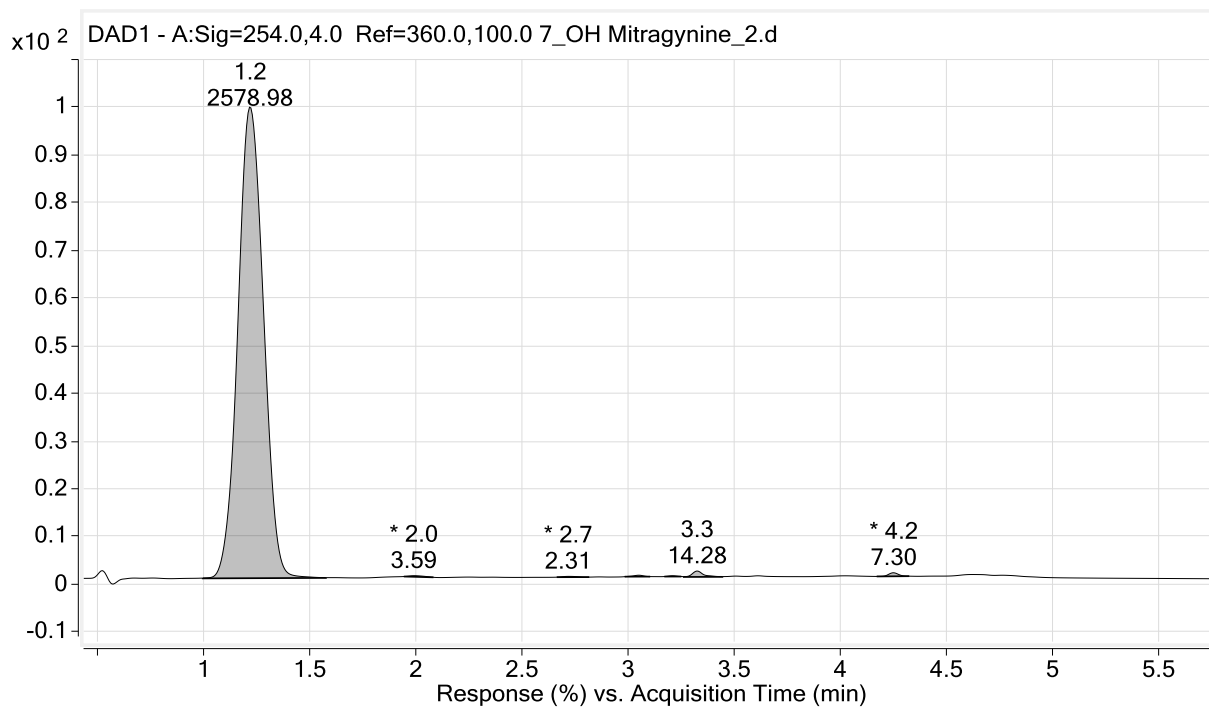

**Fig. 12S** UHPLC-PDA chromatogram and peak purity of 7-hydroxymitragynine at 254 nm.

**Table 2S** Peak purity of 7-hydroxymitragynine

| Peak | RT  | Area    | Area Sum % | Height | Width | Compound             |
|------|-----|---------|------------|--------|-------|----------------------|
| 1    | 1.2 | 2578.98 | 98.78      | 307.85 | 0.1   | 7-hydroxymitragynine |
| 2    | 2   | 3.59    | 0.14       | 0.72   | 0.1   |                      |
| 3    | 2.7 | 2.31    | 0.09       | 0.5    | 0.2   |                      |
| 4    | 3   | 3.07    | 0.12       | 0.92   | 0.1   |                      |
| 5    | 3.2 | 1.34    | 0.05       | 0.51   | 0.1   |                      |
| 6    | 3.3 | 14.28   | 0.55       | 3.86   | 0.1   |                      |
| 7    | 4.2 | 7.3     | 0.28       | 2.32   | 0.2   |                      |



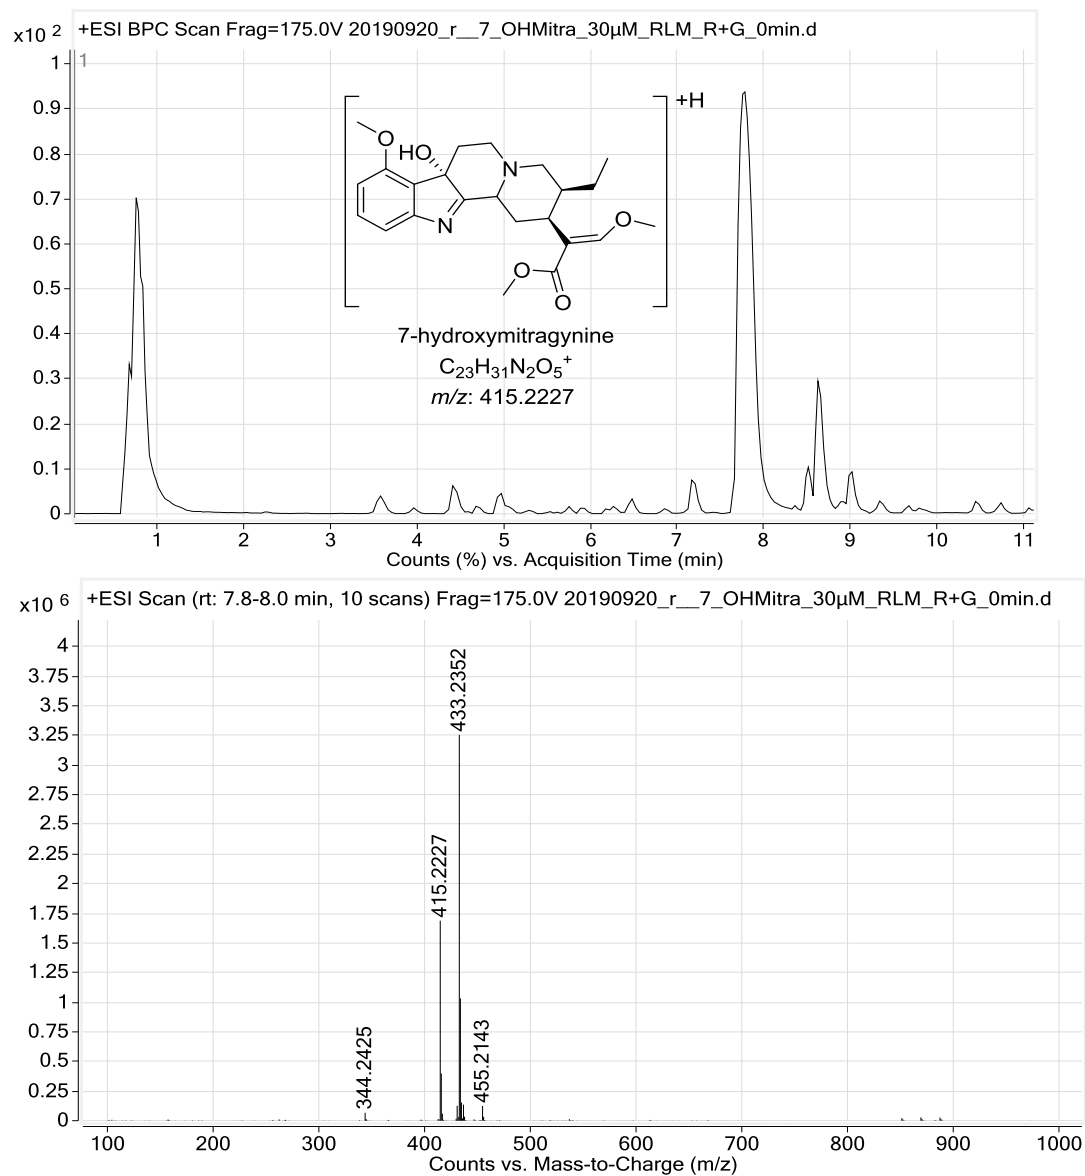

**Fig. 13S** UPLC-Q-TOF chromatogram and corresponding MS spectrum of 7-hydroxymitragynine and its water adduct

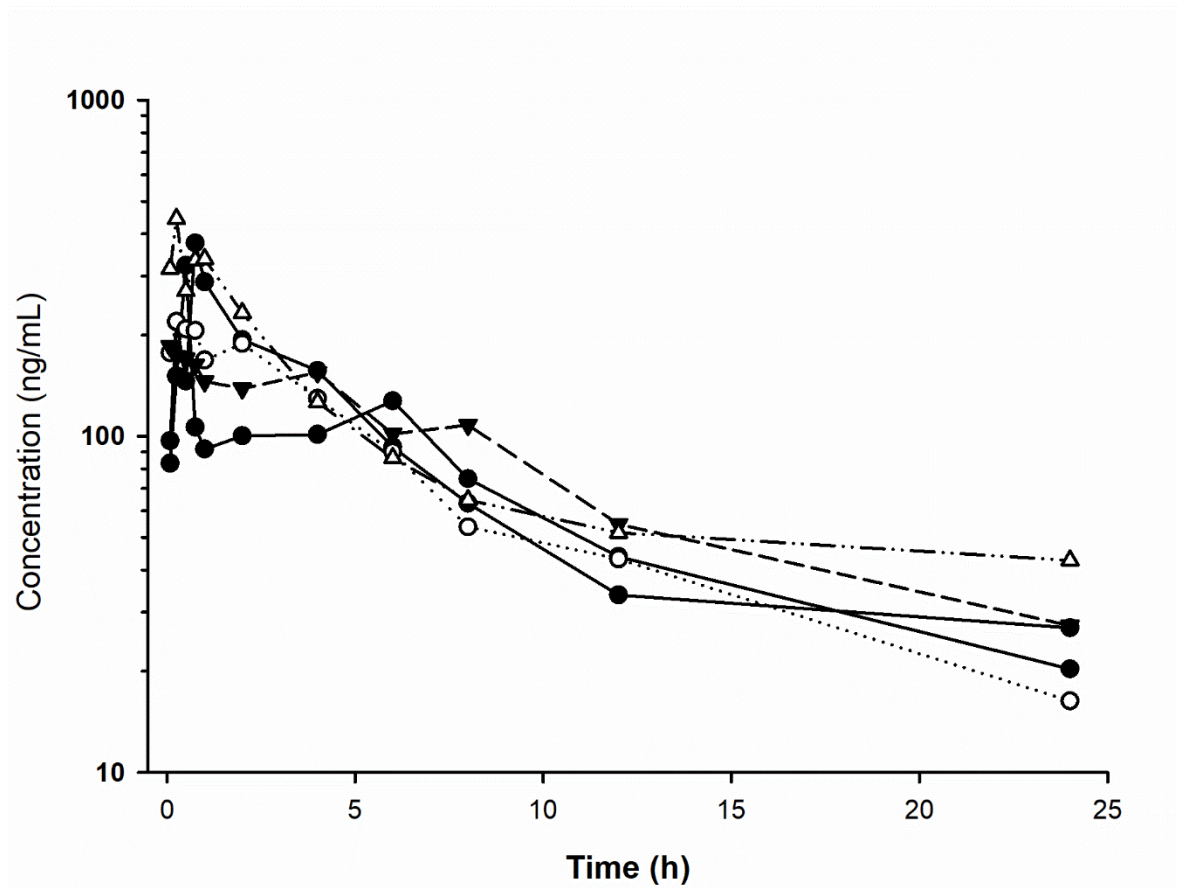

**Fig. 14S** Mean concentration-time profile of mitragynine after single oral dose (5 mg/kg) of mitragynine in female beagle dogs

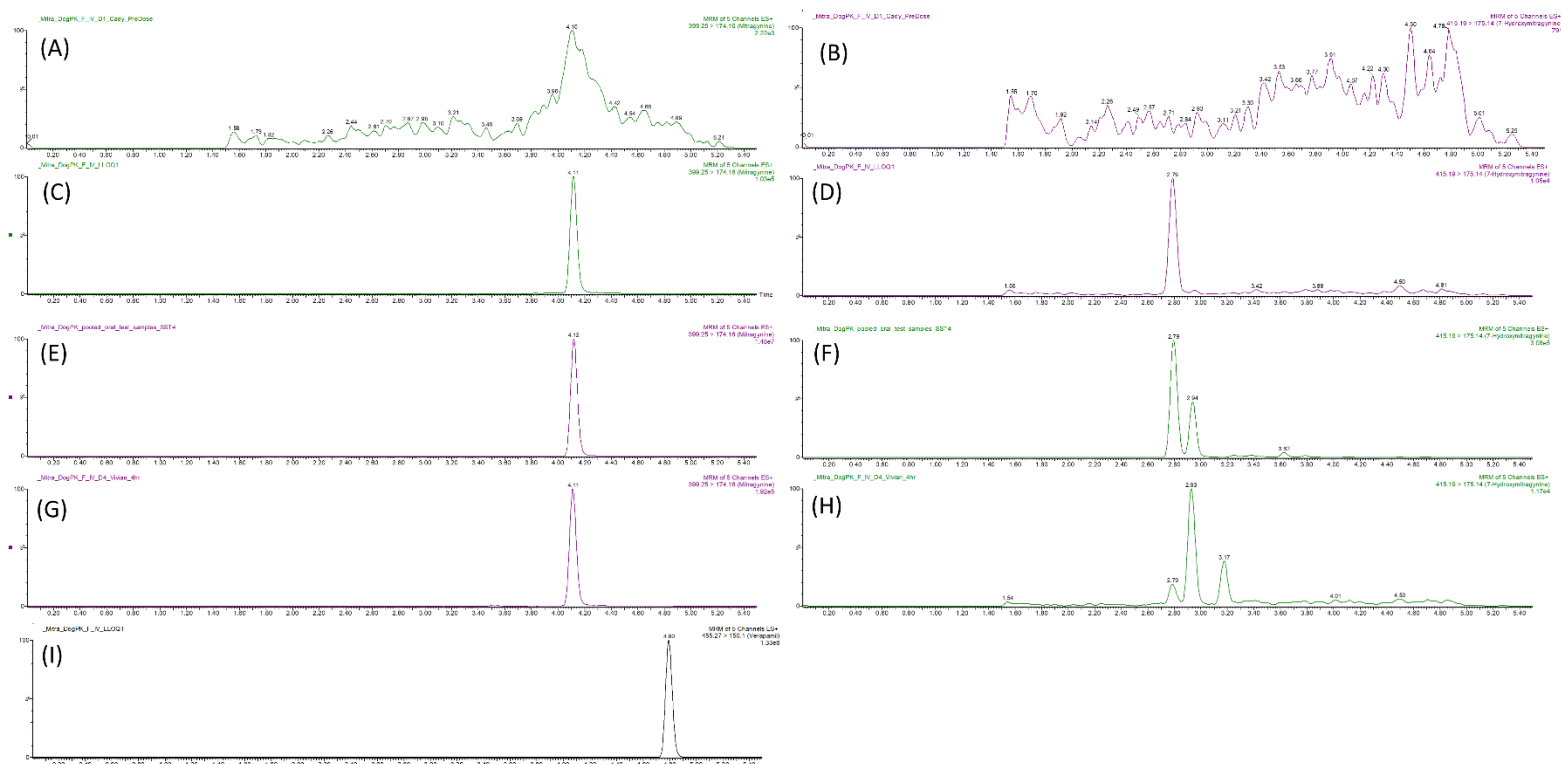

**Fig. 15S** Representative MRM chromatograms of pre-dose test sample before intravenous study for **(A)** mitragynine, and **(B)** 7-hydroxymitragynine; spiked dog plasma **(C)** mitragynine (1 ng/mL; LLOQ), and **(D)** 7-hydroxymitragynine (1 ng/mL; LLOQ); pooled plasma from oral study test samples for **(E)** mitragynine and **(F)** 7-hydroxymitragynine; test sample collected at 4 h from intravenous study (mitragynine, 0.1 mg/kg) for **(G)** mitragynine and **(H)** 7-hydroxymitragynine, **(I)** internal standard.
